# Supplementary material for: Effective nitenpyram detection in a dual-walled nitrogen-rich In(iii)/Tb(iii)–organic framework
Source: Royal Society of Chemistry journal article supplement (doi:10.1039/d1qi00224d), 2021-01-01
Supplement: d1qi00224d1.pdf [file d1qi00224d1.pdf]

## Supporting Information

### Effective nitenpyram detection in a dual-walled nitrogen-rich In(III)/Tb(III)-organic framework

Aijuan Li,<sup>a</sup> Qianqian Chu,<sup>a</sup> Huifang Zhou,<sup>a</sup> Zhipeng Yang,<sup>a</sup> Bo Liu<sup>\*a</sup> and Jiwen Zhang<sup>\*a,b,c</sup>

<sup>a</sup>College of Chemistry & Pharmacy, Northwest A&F University, Yangling 712100, P. R. China. Email: chemliubo@nwsuaf.edu.cn, nwzjw@nwsuaf.edu.cn.

<sup>b</sup>State Key Laboratory of Bioorganic and Natural Products Chemistry, Shanghai Institute of Organic Chemistry, Chinese Academy of Sciences, Shanghai 200032, P. R. China.

<sup>c</sup>Key Laboratory of Botanical Pesticide R&D in Shaanxi Province, Yangling 712100, P. R. China

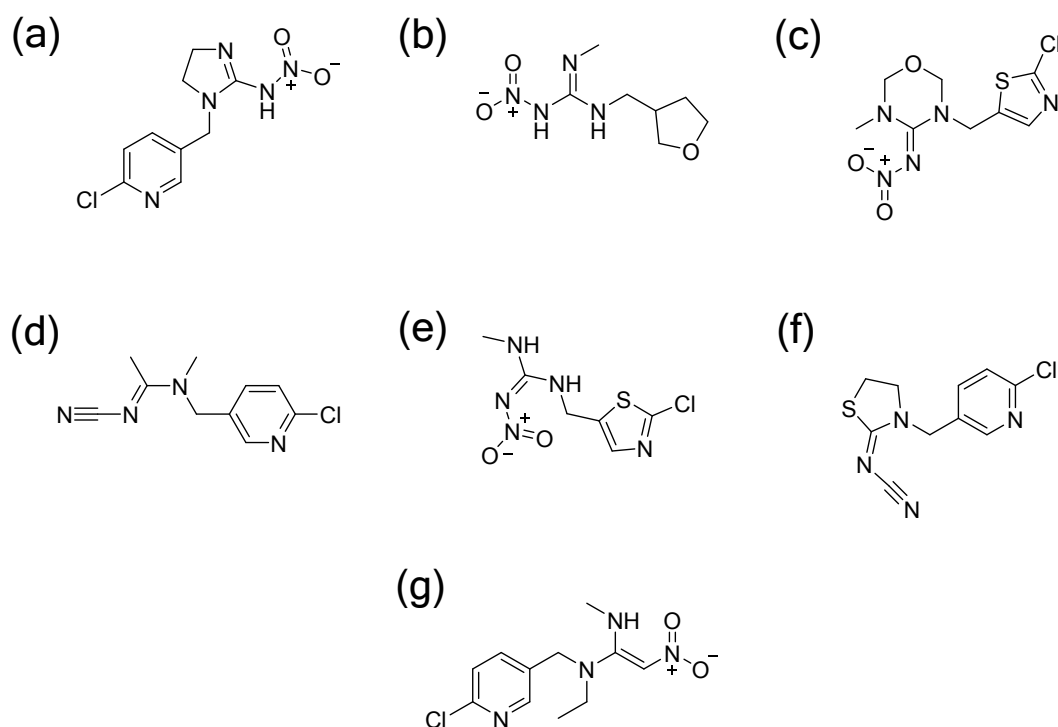

**Scheme S1** Structure of pesticides used in the text: (a) Imidacloprid, (b) Dinotefuran, (c) Thiamethoxam, (d) Acetamiprid, (e) Clothianidin, (f) Thiacloprid, and (g) Nitenpyram.

**Table S1** Crystal data and structure refinement for **1**.

|                                             |                                                                     |
|---------------------------------------------|---------------------------------------------------------------------|
| Empirical formula                           | C <sub>32</sub> H <sub>24</sub> InN <sub>8</sub> O <sub>11</sub> Tb |
| Formula weight                              | 970.33                                                              |
| Temperature/K                               | 293(2)                                                              |
| Crystal system                              | cubic                                                               |
| Space group                                 | Im $\bar{3}$                                                        |
| a/Å                                         | 27.8448(3)                                                          |
| b/Å                                         | 27.8448(3)                                                          |
| c/Å                                         | 27.8448(3)                                                          |
| $\alpha$ /°                                 | 90                                                                  |
| $\beta$ /°                                  | 90                                                                  |
| $\gamma$ /°                                 | 90                                                                  |
| V/Å <sup>3</sup>                            | 21589.0(7)                                                          |
| Z                                           | 24                                                                  |
| $\rho_{\text{calc}}$ /cm <sup>3</sup>       | 0.896                                                               |
| $\mu$ /mm <sup>-1</sup>                     | 1.330                                                               |
| F(000)                                      | 5688                                                                |
| Radiation                                   | MoK $\alpha$ ( $\lambda$ = 0.71073)                                 |
| Reflections collected                       | 15928                                                               |
| Independent reflections                     | 3722 [ $R_{\text{int}}$ = 0.0325]                                   |
| Data/restraints/parameters                  | 3722/279/203                                                        |
| GOF on F <sup>2</sup>                       | 1.077                                                               |
| Final R indexes [ $I \geq 2\sigma(I)$ ]     | $R_1 = 0.0461$ , $wR_2 = 0.1240$                                    |
| Final R indexes [all data]                  | $R_1 = 0.0571$ , $wR_2 = 0.1380$                                    |
| Largest diff. peak/hole / e Å <sup>-3</sup> | 1.65/-0.64                                                          |

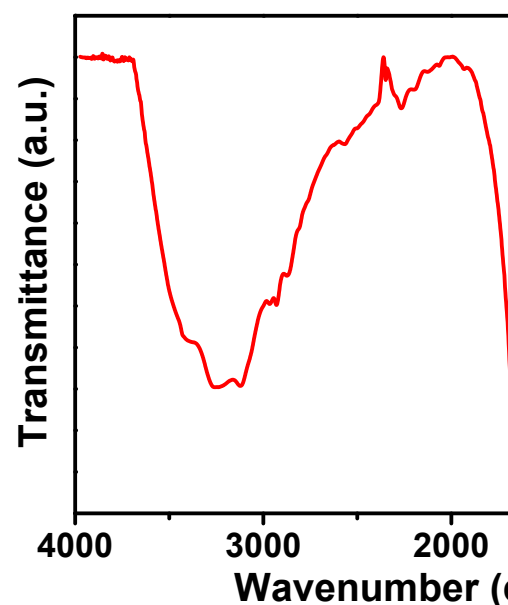**Fig. S1** IR spectra for as-synthesized of **1**.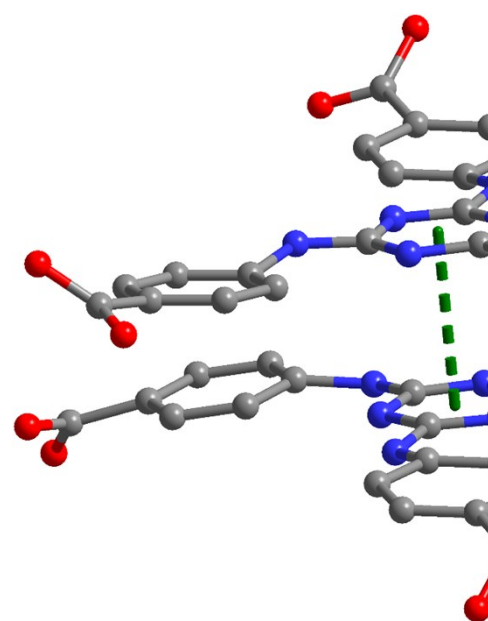**Fig. S2** The presence of  $\pi$ - $\pi$  interactions between the phenyl rings of the ligands.

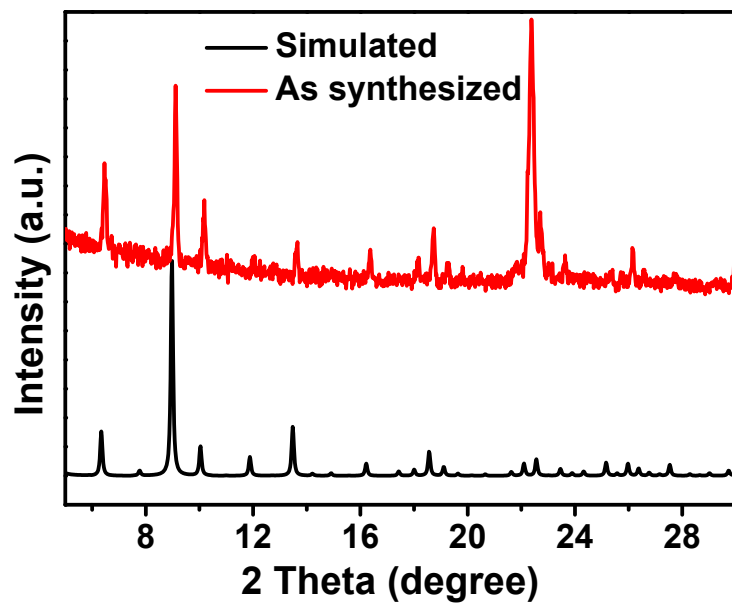

**Fig. S3** PXRD patterns of **1** simulated from the single-crystal structure and as-synthesized sample.

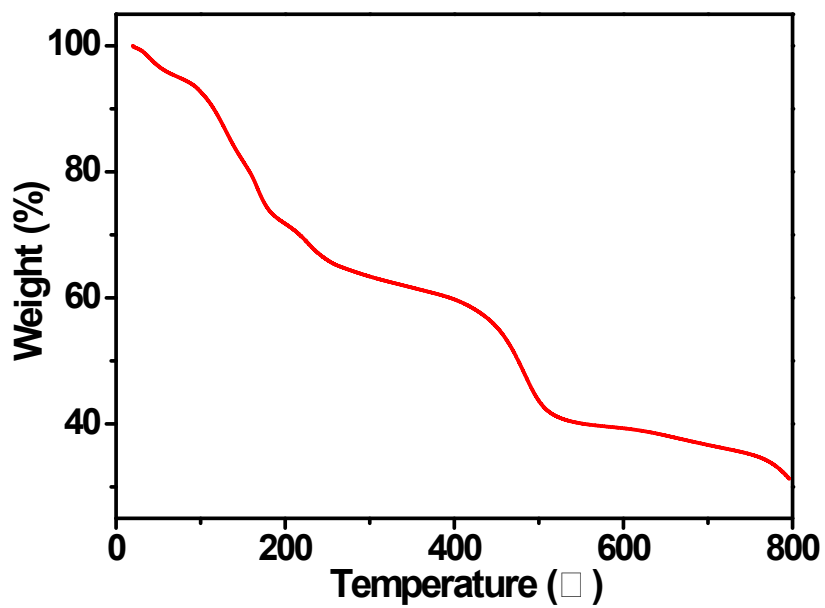

**Fig. S4** TGA curve for as-synthesized sample of **1**.

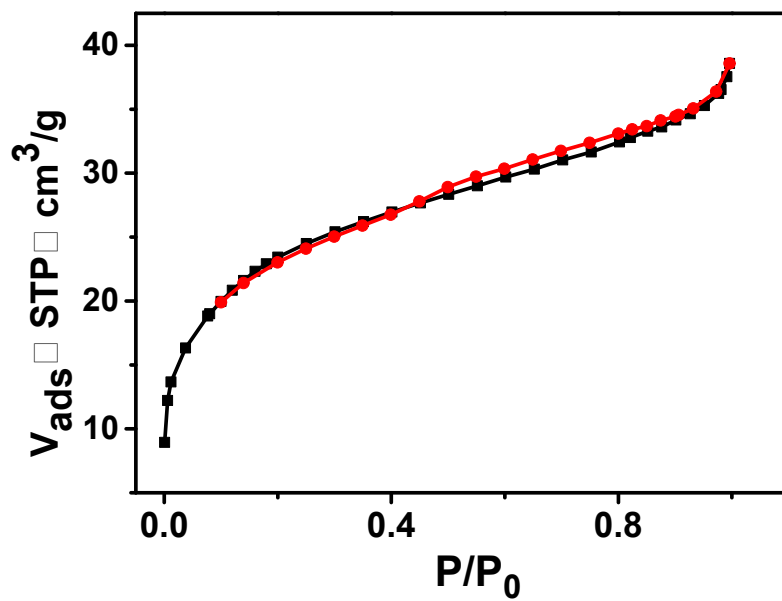

Fig. S5  $\text{N}_2$  sorption isotherm of 1 at 77 K under 1 atm.

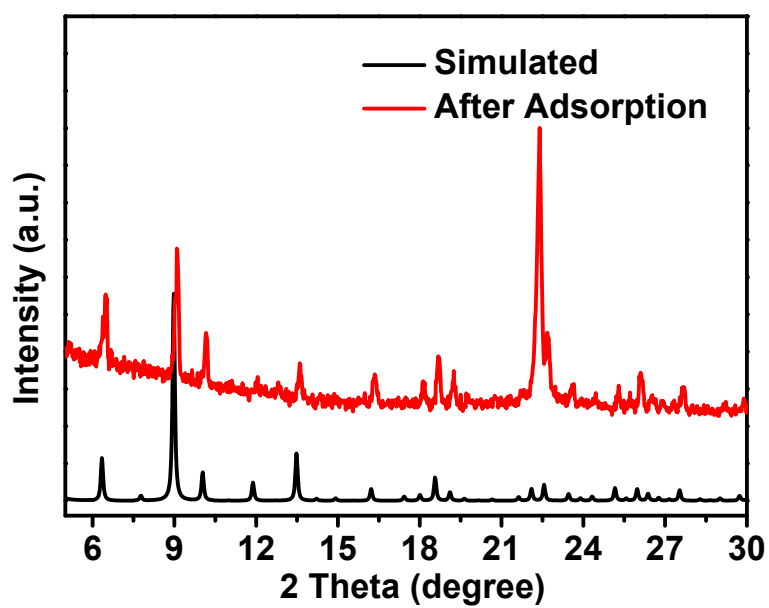

Fig. S6 PXRD pattern after  $\text{N}_2$  sorption for 1.

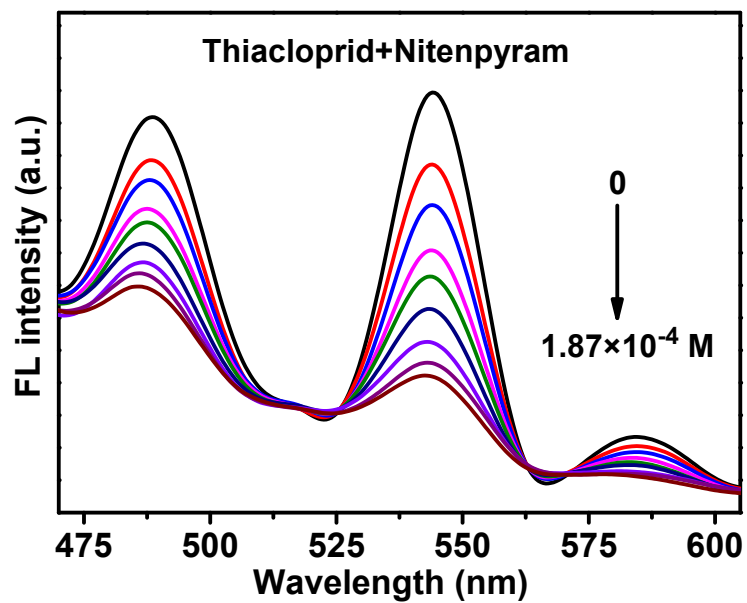

**Fig. S7** In the existence of thiacloprid, luminescence intensity of **1** under different concentrations of nitenpyram.

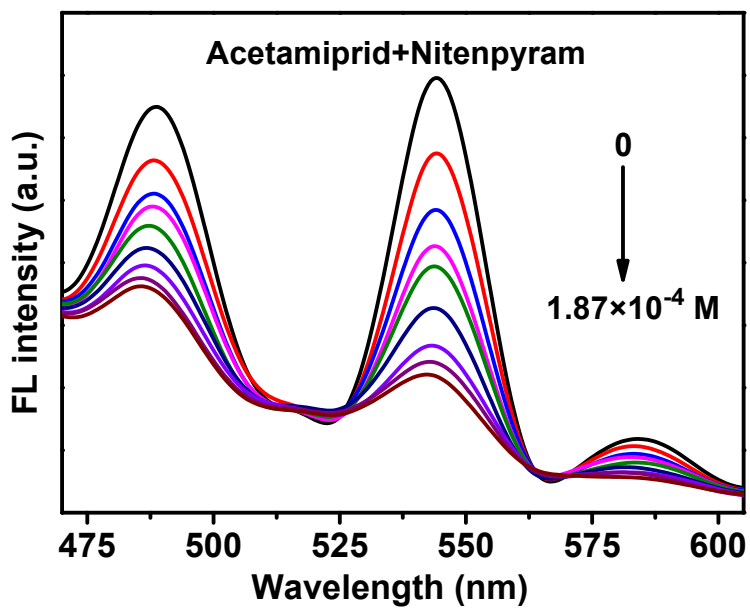

**Fig. S8** In the existence of acetamiprid, luminescence intensity of **1** under different concentrations of nitenpyram.

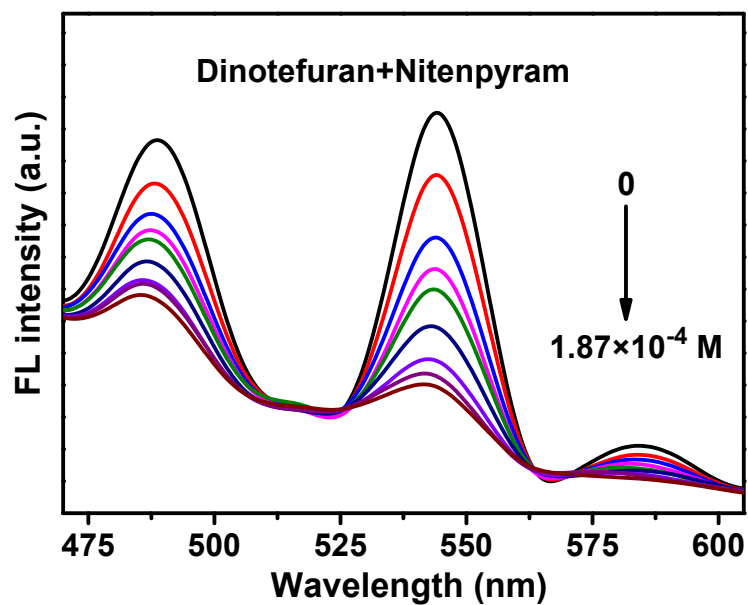

**Fig. S9** In the existence of dinotefuran, luminescence intensity of **1** under different concentrations of nitenpyram.

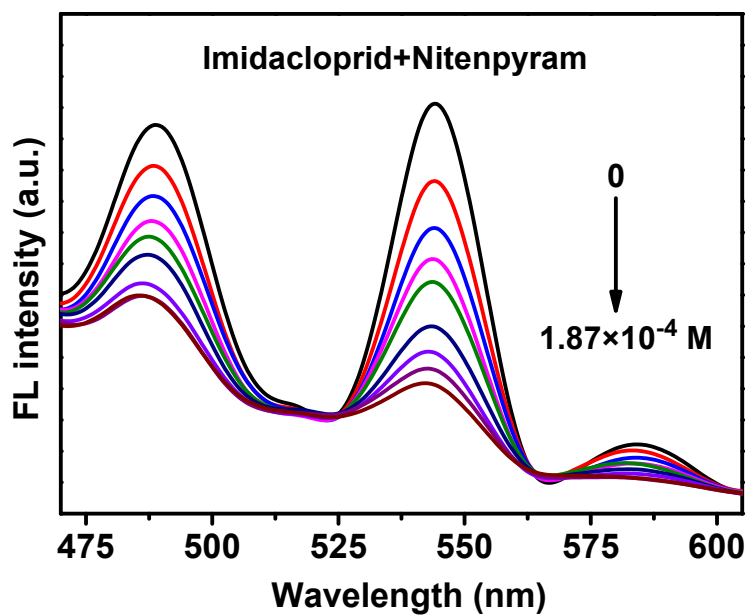

**Fig. S10** In the existence of imidacloprid exists, luminescence intensity of **1** under different concentrations of nitenpyram.

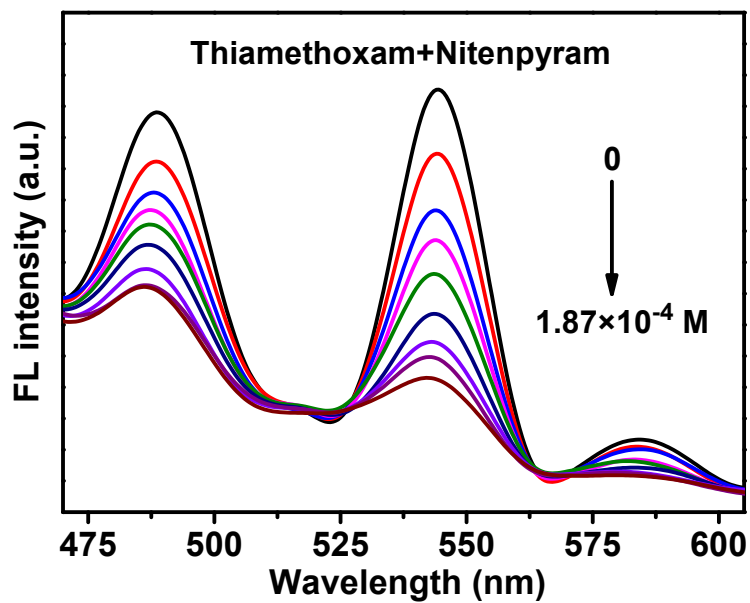

**Fig. S11** In the existence of thiamethoxam, luminescence intensity of **1** under different concentrations of nitenpyram.

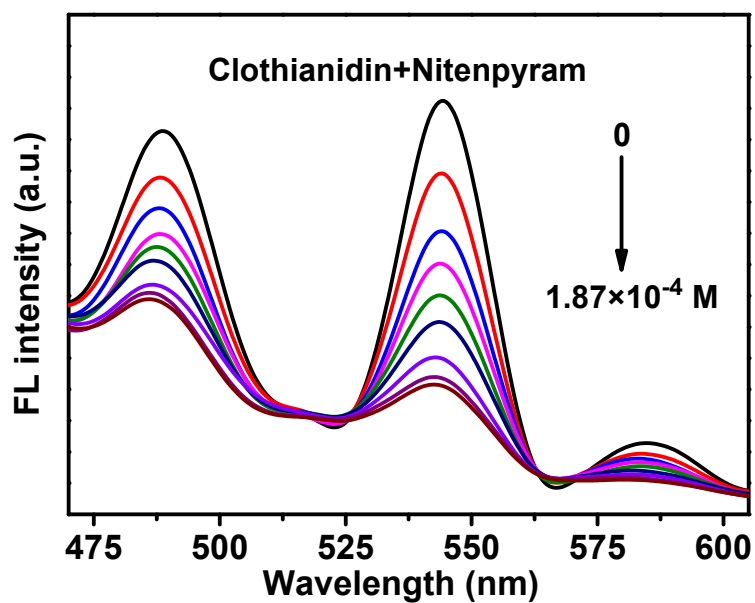

**Fig. S12** In the existence of clothianidin, luminescence intensity of **1** under different concentrations of nitenpyram.

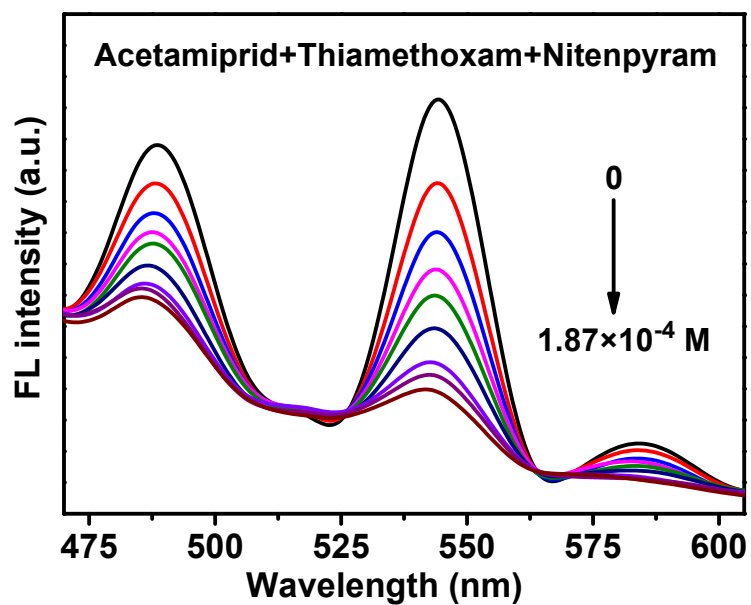

**Fig. S13** In the existence of acetamidrid and thiamethoxam, luminescence intensity of **1** under different concentrations of nitenpyram.

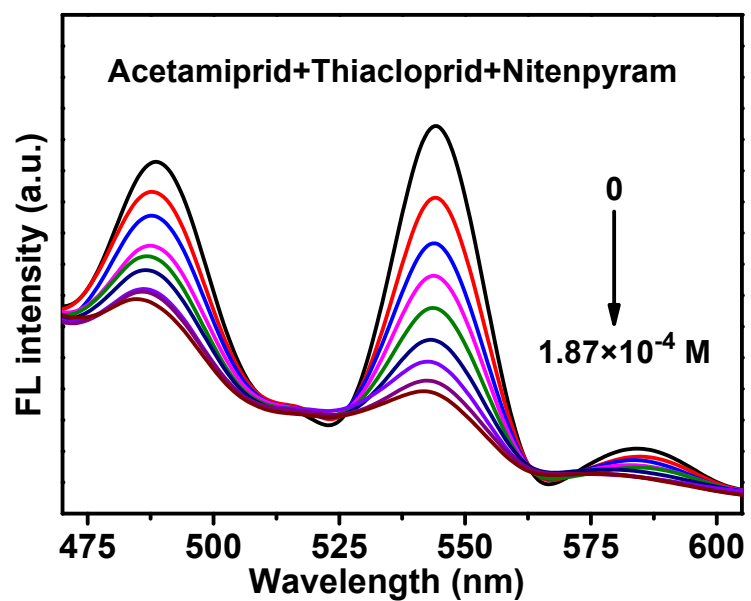

**Fig. S14** In the existence of acetamidrid and thiacloprid, luminescence intensity of **1** under different concentrations of nitenpyram.
